# Supplementary material
Source: publisher site journal article supplement (https://www.spandidos-publications.com/4697/downloadSupplementary)
Supplement: Supplementary file 1 [file downloadSupplementary]

Video S1. Cystoscopy revealed clearly visible bilateral ureteral orifices and a fistula of approximately 1 cm in diameter in the posterior bladder wall.

Video S2. Under the guidance of the guide wire, a single J-tube was slowly inserted into the ureteral orifice.
